# Supplementary material for: Bimetallic persulfide nanoflakes assembled by dealloying and sulfurization: a versatile electro-catalyst for overall water splitting and Zn–air batteries
Source: Royal Society of Chemistry journal article supplement (doi:10.1039/d1cy01414e), 2021-11-20
Supplement: d1cy01414e1.pdf [file d1cy01414e1.pdf]

## Supporting Information

### **Bimetallic persulfide nanoflake assembled by dealloying and sulfurization: a versatile electrocatalyst for overall water splitting and Zn-air batteries**

Mei Wang,<sup>af</sup> Zizai Ma,<sup>a</sup> Wenjuan Zhang,<sup>b</sup> Hefeng Yuan,<sup>a</sup> Manab Kundu,<sup>c</sup> Zhonghua Zhang,<sup>d</sup> Jinping Li,<sup>\*e</sup> and Xiaoguang Wang<sup>\*ae</sup>

<sup>a</sup> Laboratory of Advanced Materials and Energy Electrochemistry, College of Materials Science and Engineering, Taiyuan University of Technology, Taiyuan, 030024, China.  
E-mail: wangxiaog1982@163.com

<sup>b</sup> Department de Química, Universitat Autònoma de Barcelona (UAB) 08193 Bellaterra (Cerdanyola del Vallès), Spain.

<sup>c</sup> Electrochemical Energy storage Laboratory, Department of Chemistry, SRM University, Tamil Nadu 603203, India.

<sup>d</sup> School of Materials Science and Engineering, Shandong University, Jingshi Road 17923, Jinan 250061, China.

<sup>e</sup> Shanxi Key Laboratory of Gas Energy Efficient and Clean Utilization, Taiyuan, Shanxi, 030024, China. E-mail: jpli211@hotmail.com

<sup>f</sup> School of Materials Science and Engineering, North University of China, Xueyuan Road 3, Taiyuan 030051, China

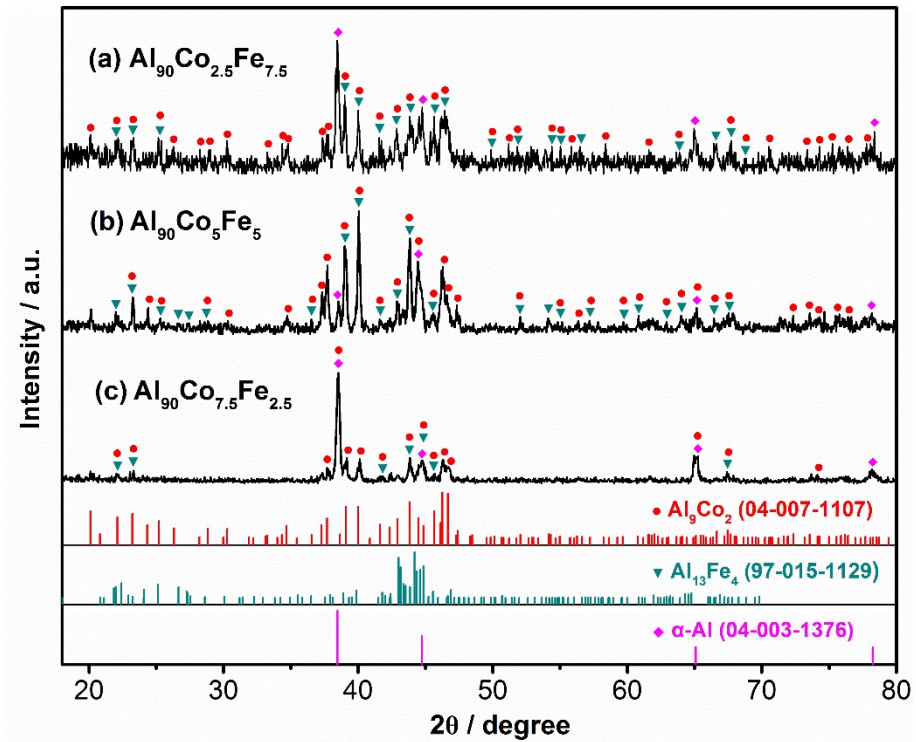

**Fig. S1** XRD patterns of (a)  $\text{Al}_{90}\text{Co}_{2.5}\text{Fe}_{7.5}$ , (b)  $\text{Al}_{90}\text{Co}_5\text{Fe}_5$  and (c)  $\text{Al}_{90}\text{Co}_{7.5}\text{Fe}_{2.5}$  precursors.

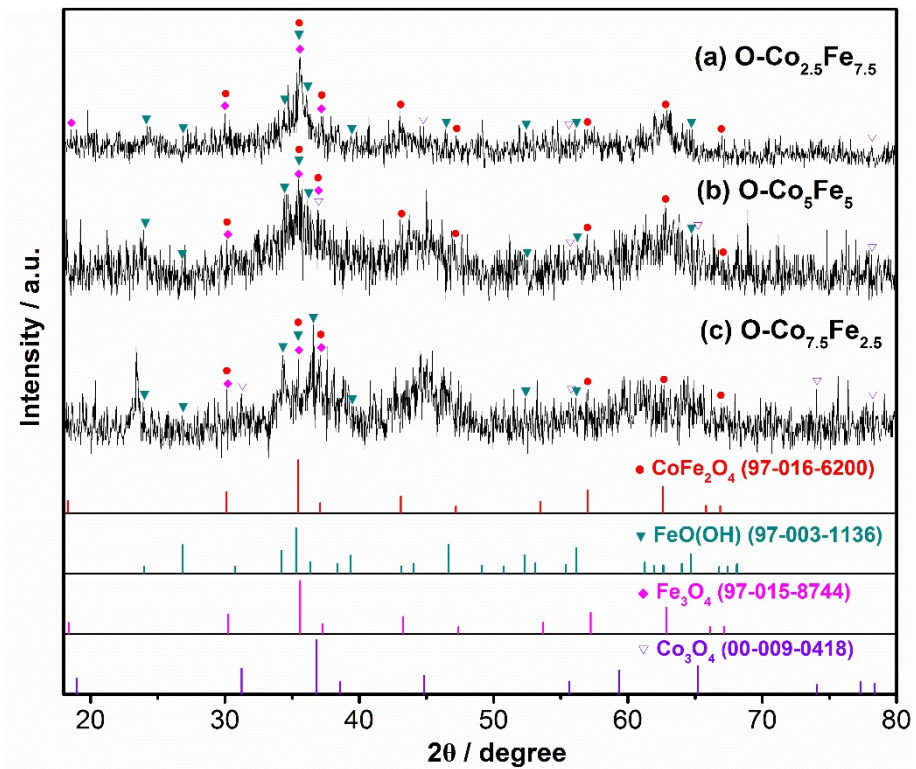

**Fig. S2** XRD patterns of (a)  $\text{O-Co}_{2.5}\text{Fe}_{7.5}$ , (b)  $\text{O-Co}_5\text{Fe}_5$  and (c)  $\text{O-Co}_{7.5}\text{Fe}_{2.5}$ .

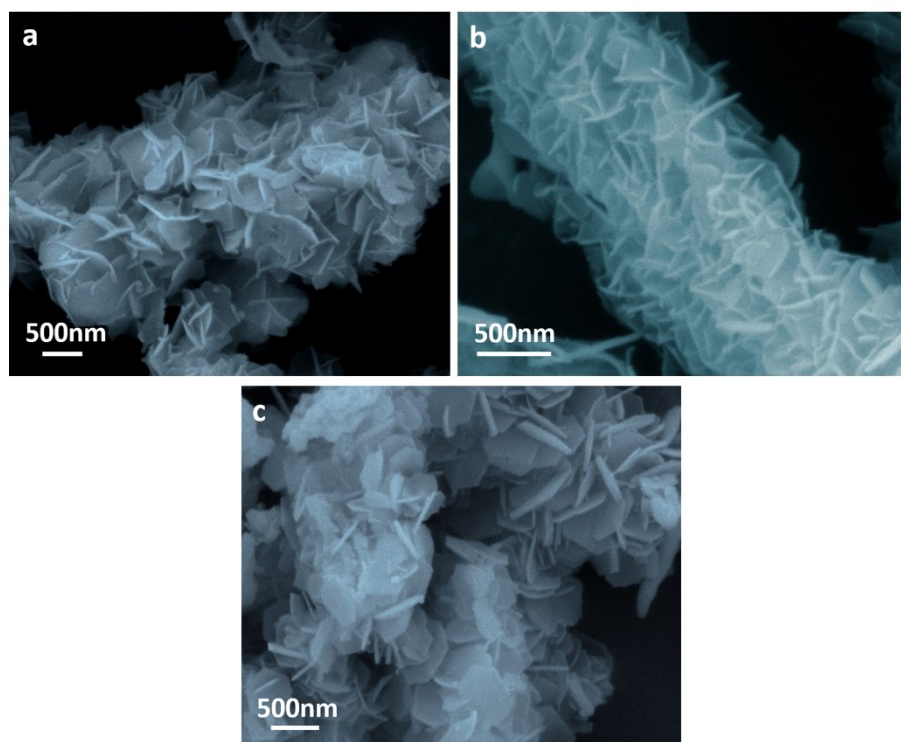

**Fig. S3** SEM images of (a) O-Co<sub>2.5</sub>Fe<sub>7.5</sub>, (b) O-Co<sub>5</sub>Fe<sub>5</sub> and (c) O-Co<sub>7.5</sub>Fe<sub>2.5</sub>.

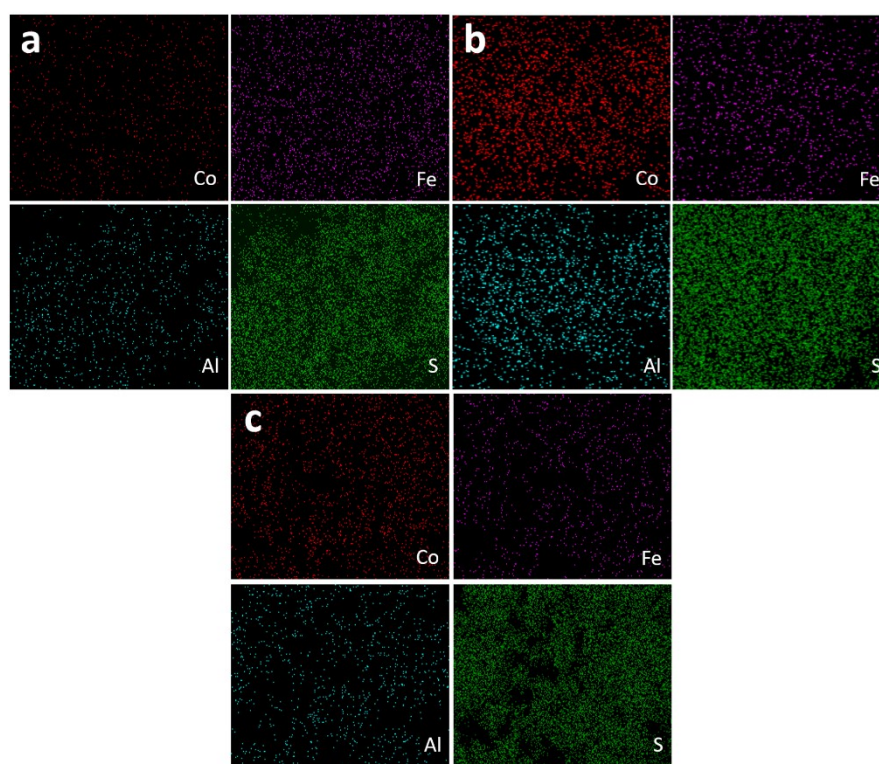

**Fig. S4** EDX elemental mappings of Co, Fe, Al and S for (a) S-Co<sub>2.5</sub>Fe<sub>7.5</sub>, (b) S-Co<sub>2.5</sub>Fe<sub>7.5</sub> and (c) S-Co<sub>7.5</sub>Fe<sub>2.5</sub>.

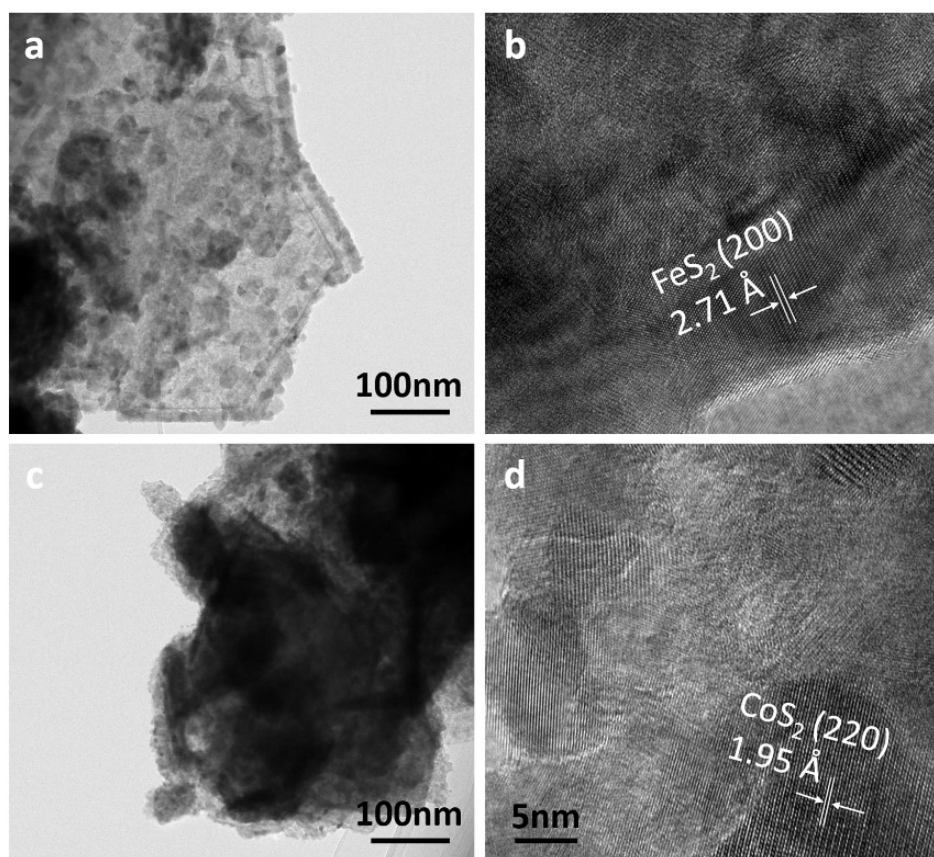

**Fig. S5** (a) TEM and (b) HRTEM images of S-Co<sub>2.5</sub>Fe<sub>7.5</sub>. (c) TEM and (b) HRTEM image of S-Co<sub>7.5</sub>Fe<sub>2.5</sub>.



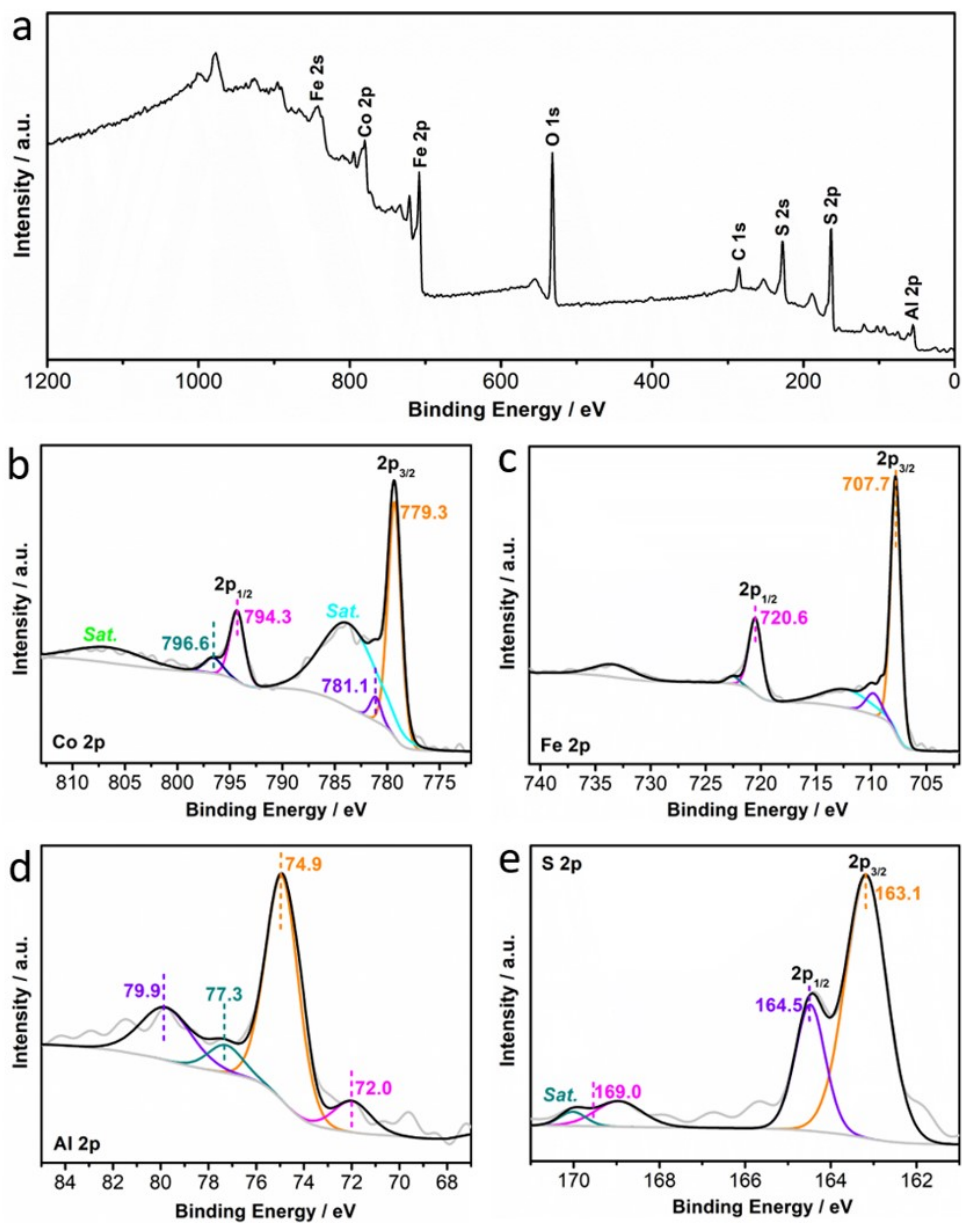

**Fig. S6** XPS spectra of S-Co<sub>2.5</sub>Fe<sub>7.5</sub> sample. (a) Survey spectrum, (b) Co 2p, (c) Fe 2p, (d) Al 2p, (e) S 2p.

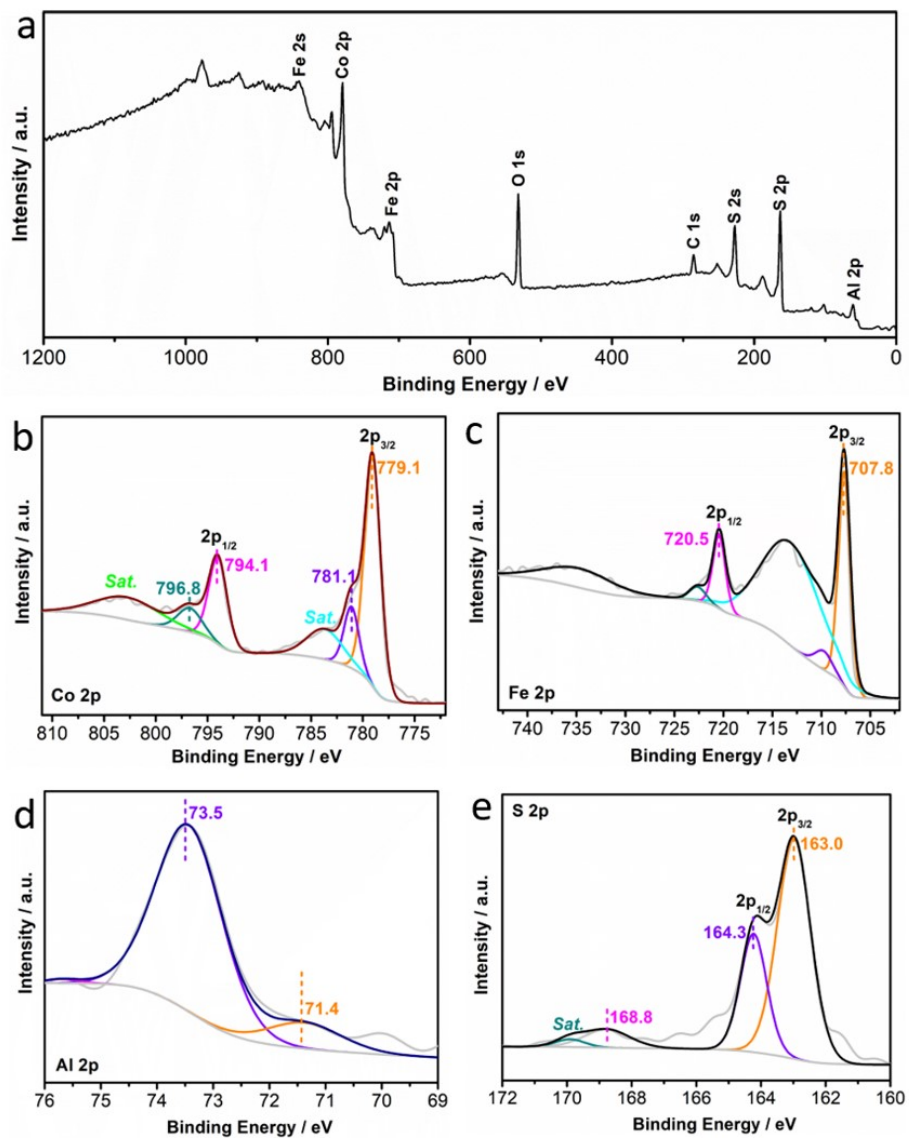

**Fig. S7** XPS spectra of S-Co<sub>7.5</sub>Fe<sub>2.5</sub> sample. (a) Survey spectrum, (b) Co 2p, (c) Fe 2p, (d) Al 2p, (e) S 2p.

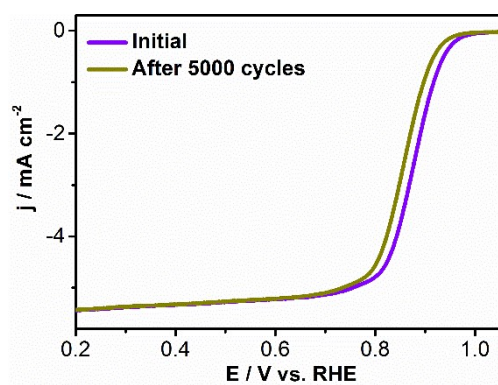

**Fig. S8** LSV curves of Pt/C measured before and after 5000 ADT continuous cycles.

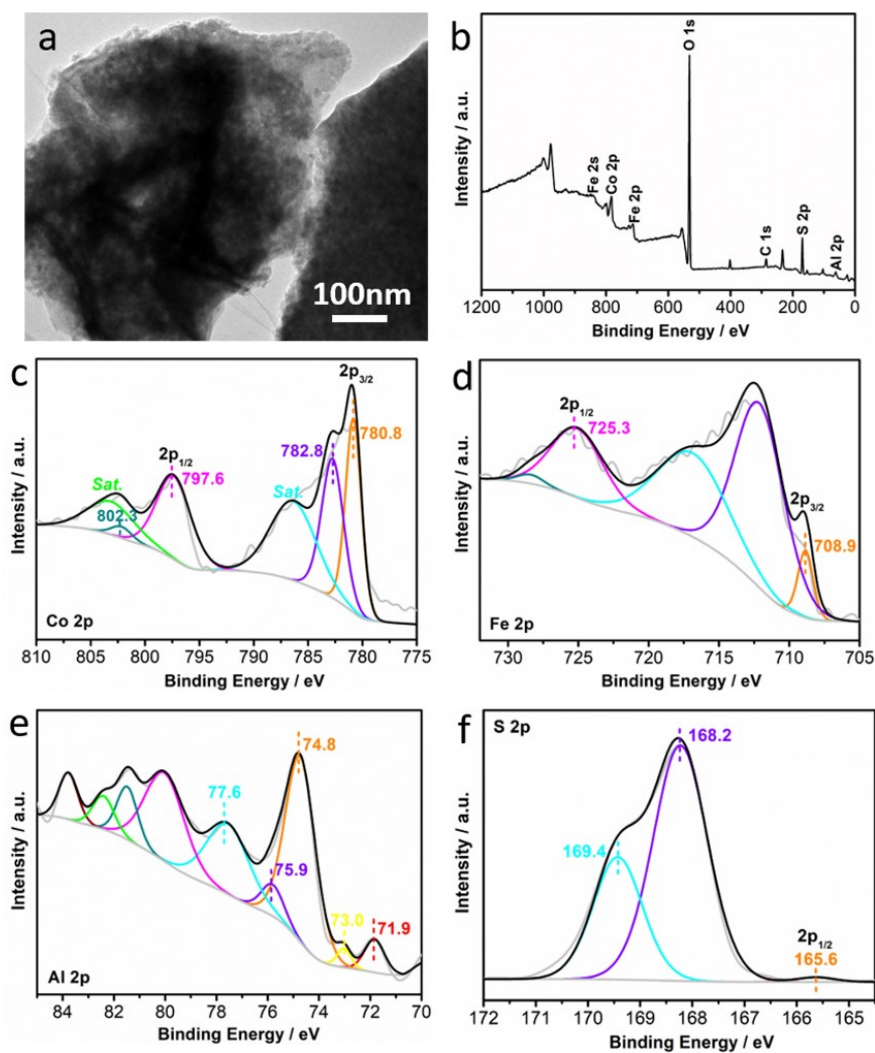

**Fig. S9** (a) TEM image and (b-f) XPS spectra of S-Co<sub>5</sub>Fe<sub>5</sub> electrode after both ADT and subsequent CA test in 0.1 M KOH solution.

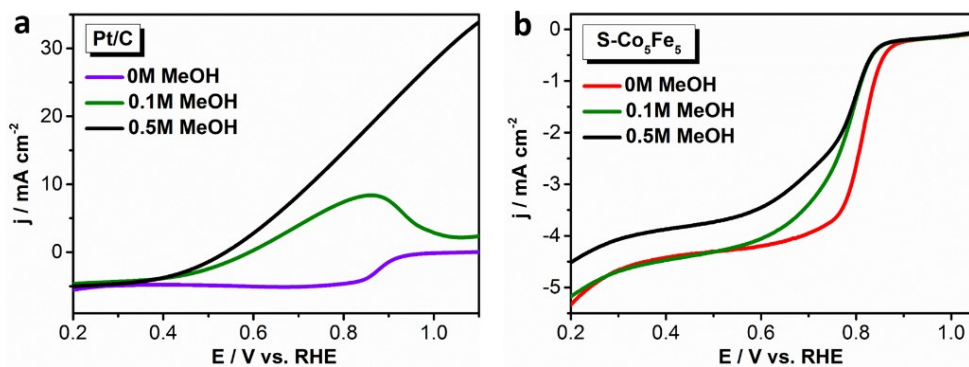

**Fig. S10** Methanol tolerance comparison of (a) Pt/C and (b) S-Co<sub>5</sub>Fe<sub>5</sub>.

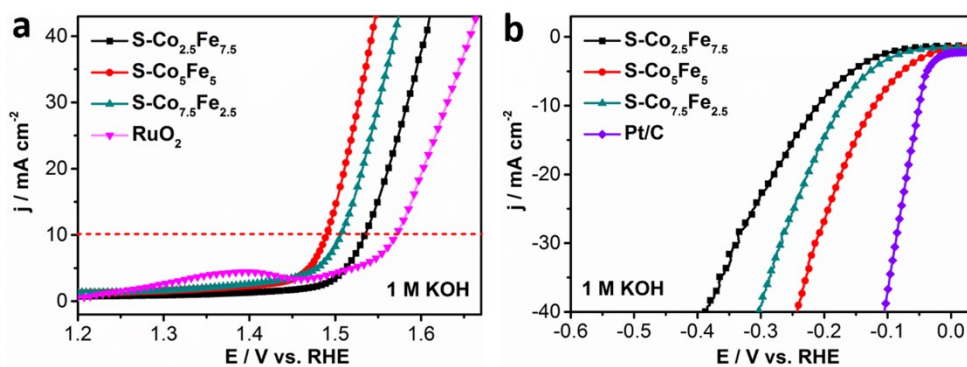

**Fig. S11** (a) OER polarization curves of S-Co<sub>2.5</sub>Fe<sub>7.5</sub>, S-Co<sub>5</sub>Fe<sub>5</sub>, S-Co<sub>7.5</sub>Fe<sub>2.5</sub> and RuO<sub>2</sub> in 1.0 M KOH. (b) HER polarization curves of S-Co<sub>2.5</sub>Fe<sub>7.5</sub>, S-Co<sub>5</sub>Fe<sub>5</sub>, S-Co<sub>7.5</sub>Fe<sub>2.5</sub> and Pt/C in 1.0 M KOH.



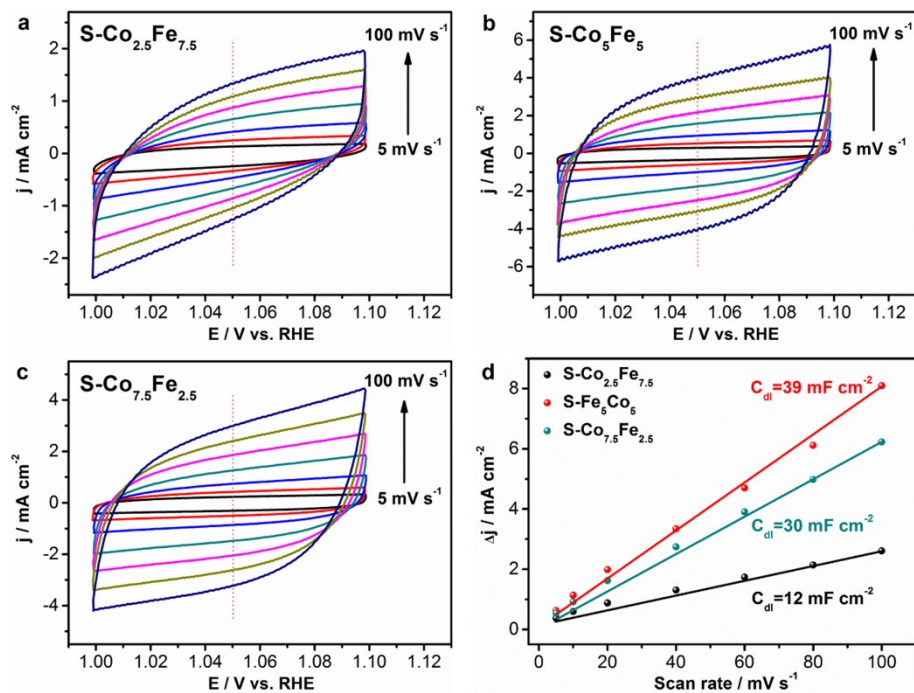

**Fig. S12** CV curves of (a) S-Co<sub>2.5</sub>Fe<sub>7.5</sub>, (b) S-Co<sub>5</sub>Fe<sub>5</sub> and (c) S-Co<sub>7.5</sub>Fe<sub>2.5</sub> electrodes in the potential range of 1.0~1.1 V vs. RHE under different scan rates. (d) Capacitive currents at the middle of potential window as a function of scan rate.

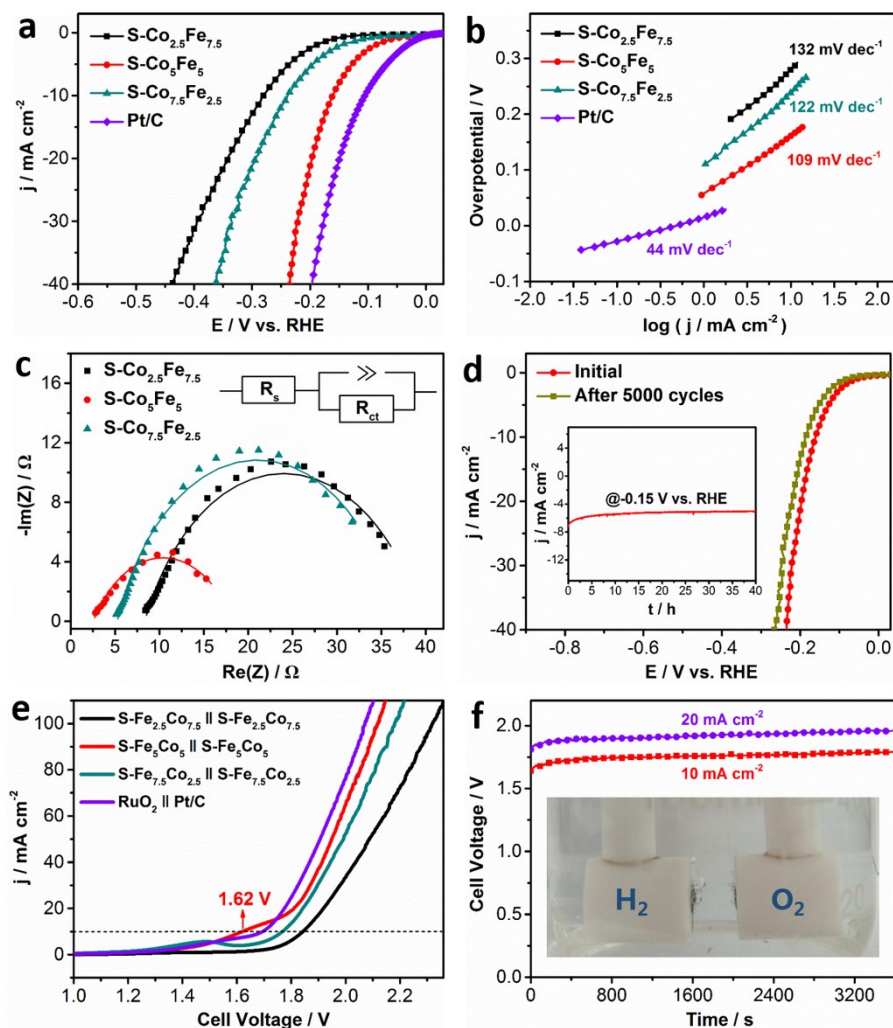

**Fig. S13** (a) HER polarization curves of S-Co<sub>2.5</sub>Fe<sub>7.5</sub>, S-Co<sub>5</sub>Fe<sub>5</sub>, S-Co<sub>7.5</sub>Fe<sub>2.5</sub> and Pt/C in 0.1 M KOH. (b) Tafel plots. (c) Nyquist plots for S-Co<sub>2.5</sub>Fe<sub>7.5</sub>, S-Co<sub>5</sub>Fe<sub>5</sub> and S-Co<sub>7.5</sub>Fe<sub>2.5</sub> at -0.1 V vs. RHE (The inset is the equivalent circuit for fitting). (d) LSV curves of S-Co<sub>5</sub>Fe<sub>5</sub> measured before and after 5000 ADT continuous cycles (The inset is the  $j$ - $t$  profile recorded at a -0.15 V for 40 h). (e) Polarization curves of two-electrode devices for overall water splitting in 0.1 M KOH. (f) Stability curves of S-Co<sub>5</sub>Fe<sub>5</sub> || S-Co<sub>5</sub>Fe<sub>5</sub> under constant currents of 10 and 20 mA cm<sup>-2</sup> (The inset is the photograph of overall water splitting).

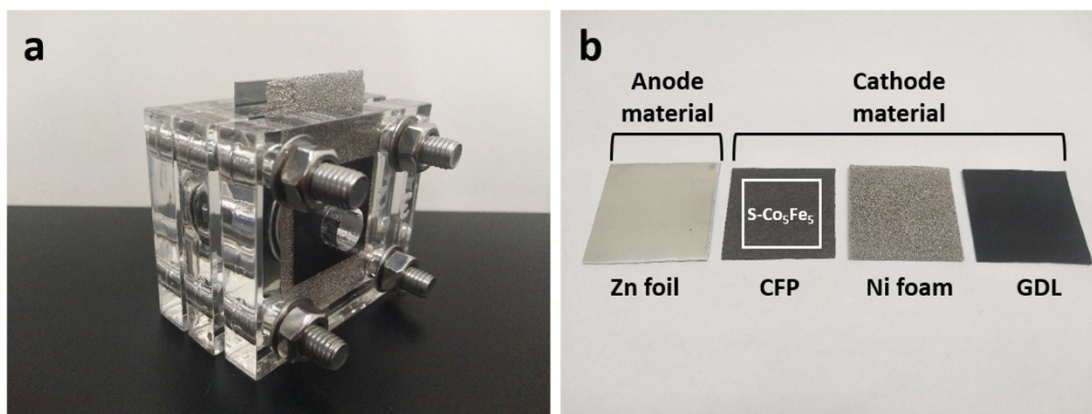

**Fig. S14** (a) Photograph of the Zn-air battery device. (b) Photographs of the anode and cathode materials.

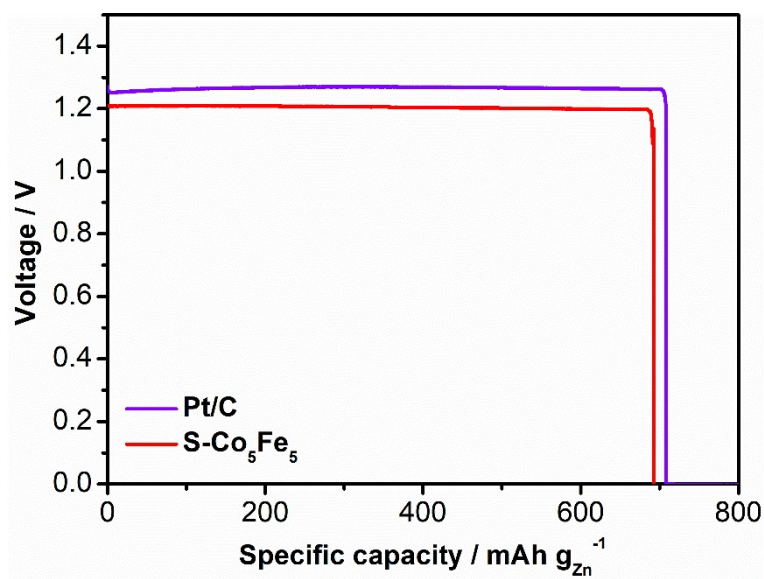

**Fig. S15** The discharge specific capacity plots of ZnAB (Zn plate || S-Co<sub>5</sub>Fe<sub>5</sub>) and ZnAB (Zn plate || Pt/C) at a current density of 10 mA cm<sup>-2</sup>.

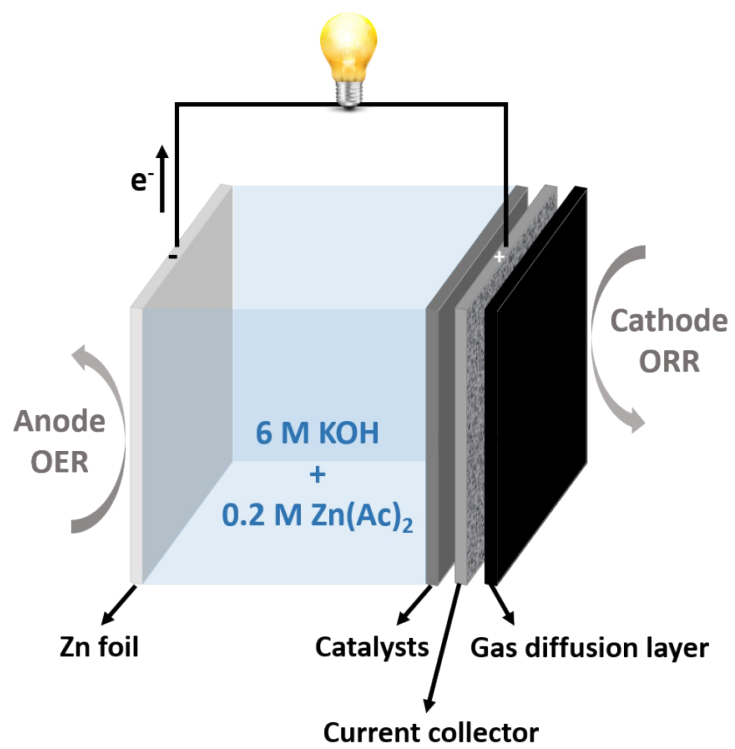

**Fig. S16** A schematic of the rechargeable Zn-air battery.

**Table S1** ICP analysis for S-Co<sub>x</sub>Fe<sub>10-x</sub> (x=2.5, 5, 7.5).

| Catalysts                             | Element proportion (at. %) |       |       |       |
|---------------------------------------|----------------------------|-------|-------|-------|
|                                       | Al                         | Co    | Fe    | S     |
| S-Co <sub>2.5</sub> Fe <sub>7.5</sub> | 3.97                       | 11.81 | 38.07 | 46.15 |
| S-Co <sub>5</sub> Fe <sub>5</sub>     | 2.74                       | 16.12 | 15.94 | 65.2  |
| S-Co <sub>7.5</sub> Fe <sub>2.5</sub> | 1.93                       | 37.35 | 12.74 | 47.98 |

**Table S2** Comparison of ORR performance in 0.1 M KOH for the as-prepared catalysts in this study with the other reported catalysts in literatures.

| Catalysts                                   | E <sub>onset</sub><br>(V) | E <sub>1/2</sub><br>(V) | Tafel slope<br>(mV dec <sup>-1</sup> ) | Reference        |
|---------------------------------------------|---------------------------|-------------------------|----------------------------------------|------------------|
| S-Co <sub>2.5</sub> Fe <sub>7.5</sub>       | <b>0.84</b>               | <b>0.62</b>             | <b>169</b>                             | <b>This work</b> |
| S-Co <sub>5</sub> Fe <sub>5</sub>           | <b>0.91</b>               | <b>0.79</b>             | <b>64</b>                              | <b>This work</b> |
| S-Co <sub>7.5</sub> Fe <sub>2.5</sub>       | <b>0.86</b>               | <b>0.72</b>             | <b>85</b>                              | <b>This work</b> |
| Pt/C                                        | <b>0.99</b>               | <b>0.87</b>             | <b>61</b>                              | <b>This work</b> |
| NiCo <sub>2</sub> O <sub>4</sub> @NiCoFe-OH | 0.89                      | 0.77                    | --                                     | 1                |
| NiO/NiCo <sub>2</sub> O <sub>4</sub>        | 0.89                      | 0.73                    | 85.4                                   | 2                |
| Co/PCNF                                     | --                        | 0.78                    | --                                     | 3                |
| CoSe <sub>2</sub>                           | 0.82                      | 0.75                    | 107                                    | 4                |



**Table S3** Comparison of OER performance in 0.1 M KOH for the as-prepared catalysts in this study with the other reported catalysts in literatures.

| Catalysts                                               | $\eta_{\text{onset}}$<br>(mV) | $\eta_{10}$<br>(mV) | Tafel slope<br>(mV dec <sup>-1</sup> ) | Reference        |
|---------------------------------------------------------|-------------------------------|---------------------|----------------------------------------|------------------|
| <b>S-Co<sub>2.5</sub>Fe<sub>7.5</sub></b>               | <b>150</b>                    | <b>390</b>          | <b>114</b>                             | <b>This work</b> |
| <b>S-Co<sub>5</sub>Fe<sub>5</sub></b>                   | <b>70</b>                     | <b>300</b>          | <b>79</b>                              | <b>This work</b> |
| <b>S-Co<sub>7.5</sub>Fe<sub>2.5</sub></b>               | <b>130</b>                    | <b>330</b>          | <b>86</b>                              | <b>This work</b> |
| <b>RuO<sub>2</sub></b>                                  | <b>200</b>                    | <b>370</b>          | <b>96</b>                              | <b>This work</b> |
| W-N/C-4@Co <sub>9</sub> S <sub>8</sub> @WS <sub>2</sub> | --                            | 560                 | 36                                     | 5                |
| LaMnNiCoO <sub>3</sub> (1:2:3)                          | --                            | 370                 | --                                     | 6                |
| ZnCoMnO <sub>4</sub> /N-rGO                             | 340                           | 480                 | 158                                    | 7                |
| Fe/Ni-N-C                                               | --                            | 322                 | 69                                     | 8                |

**Table S4** EIS parameters obtained by fitting the Nyquist plots to the equivalent circuit model in 0.1 M KOH at 1.5 V vs. RHE.

| Catalysts                             | $R_s$ ( $\Omega$ ) | $R_{ct}$ ( $\Omega$ ) | $Q_1$ (F cm <sup>-2</sup> ) | $n_1$ |
|---------------------------------------|--------------------|-----------------------|-----------------------------|-------|
| S-Co <sub>2.5</sub> Fe <sub>7.5</sub> | 2.662              | 12.59                 | 0.0101                      | 0.918 |
| S-Co <sub>5</sub> Fe <sub>5</sub>     | 1.104              | 1.290                 | 0.1078                      | 0.785 |
| S-Co <sub>7.5</sub> Fe <sub>2.5</sub> | 1.820              | 8.887                 | 0.0229                      | 0.957 |

**Table S5** Comparison of OER/ORR bi-functional activities for the as-prepared catalysts in this study with the other reported catalysts in literatures.

| Catalysts                                                           | Electrolyte      | OER          | ORR           | $\Delta E = E_{10} - E_{1/2}$ | Reference        |
|---------------------------------------------------------------------|------------------|--------------|---------------|-------------------------------|------------------|
|                                                                     |                  | $E_{10}$ (V) | $E_{1/2}$ (V) | (V)                           |                  |
| <b>S-Co<sub>2.5</sub>Fe<sub>7.5</sub></b>                           | <b>0.1 M KOH</b> | <b>1.62</b>  | <b>0.62</b>   | <b>1.00</b>                   | <b>This work</b> |
| <b>S-Co<sub>5</sub>Fe<sub>5</sub></b>                               | <b>0.1 M KOH</b> | <b>1.53</b>  | <b>0.79</b>   | <b>0.74</b>                   | <b>This work</b> |
| <b>S-Co<sub>7.5</sub>Fe<sub>2.5</sub></b>                           | <b>0.1 M KOH</b> | <b>1.56</b>  | <b>0.72</b>   | <b>0.84</b>                   | <b>This work</b> |
| <b>RuO<sub>2</sub></b>                                              | <b>0.1 M KOH</b> | <b>1.60</b>  | <b>0.31</b>   | <b>1.29</b>                   | <b>This work</b> |
| <b>Pt/C</b>                                                         | <b>0.1 M KOH</b> | <b>1.73</b>  | <b>0.87</b>   | <b>0.86</b>                   | <b>This work</b> |
| FeCo/Co <sub>2</sub> P@NPCF                                         | 0.1 M KOH        | 1.56         | 0.79          | 0.77                          | 9                |
| NiCo <sub>2</sub> O <sub>4</sub>                                    | 0.1 M KOH        | 1.64         | 0.77          | 0.87                          | 10               |
| CoDNG900                                                            | 0.1 M KOH        | 1.613        | 0.864         | ~0.75                         | 11               |
| NiO/NiCo <sub>2</sub> O <sub>4</sub>                                | 0.1 M KOH        | 1.587        | 0.73          | 0.857                         | 2                |
| Co@Co <sub>3</sub> O <sub>4</sub> /NC-1                             | 0.1 M KOH        | 1.65         | 0.80          | 0.85                          | 12               |
| Co(OH) <sub>2</sub> +N-rGO                                          | 0.1 M KOH        | 1.66         | 0.79          | 0.87                          | 13               |
| CoO@Co/N-rGO                                                        | 0.1 M KOH        | 1.64         | 0.73          | 0.91                          | 14               |
| NiFe-LDH/Fe-N-C<br>(1:1)                                            | 0.1 M KOH        | 1.515        | 0.728         | 0.787                         | 15               |
| Fe@N-C-700                                                          | 0.1 M KOH        | 1.71         | 0.83          | 0.88                          | 16               |
| Co <sub>3</sub> O <sub>4</sub> /2.7Co <sub>2</sub> MnO <sub>4</sub> | 0.1 M KOH        | 1.77         | 0.68          | 1.09                          | 17               |
| Co <sub>3</sub> FeS <sub>1.5</sub> (OH) <sub>6</sub>                | 0.1 M KOH        | 1.588        | 0.721         | 0.867                         | 18               |
| CuS/NiS <sub>2</sub>                                                | 0.1 M KOH        | 1.52         | 0.73          | 0.79                          | 19               |
| FeCo-Co <sub>4</sub> N/N-C                                          | 0.1 M KOH        | 1.51         | 0.76          | 0.75                          | 20               |
| PPy/FeTCPP/Co                                                       | 0.1 M KOH        | 1.61         | 0.86          | 0.75                          | 21               |
| Ni/NiO/NiCo <sub>2</sub> O <sub>4</sub> /<br>N-CNT-As               | 0.1 M KOH        | 1.60         | 0.74          | 0.86                          | 22               |

**Table S6** Comparison of HER performance in 0.1 M KOH for the as-prepared catalysts in this study with the other reported catalysts in literatures.

| Catalysts                                 | $\eta_{\text{onset}}$<br>(mV) | $\eta_{10}$<br>(mV) | Tafel slope<br>(mV dec <sup>-1</sup> ) | Reference        |
|-------------------------------------------|-------------------------------|---------------------|----------------------------------------|------------------|
| <b>S-Co<sub>2.5</sub>Fe<sub>7.5</sub></b> | <b>160</b>                    | <b>280</b>          | <b>132</b>                             | <b>This work</b> |
| <b>S-Co<sub>5</sub>Fe<sub>5</sub></b>     | <b>57</b>                     | <b>161</b>          | <b>109</b>                             | <b>This work</b> |
| <b>S-Co<sub>7.5</sub>Fe<sub>2.5</sub></b> | <b>108</b>                    | <b>238</b>          | <b>122</b>                             | <b>This work</b> |
| <b>Pt/C</b>                               | <b>16</b>                     | <b>106</b>          | <b>44</b>                              | <b>This work</b> |
| PPy/FeTCPP/Co                             | --                            | 240                 | 83                                     | 21               |
| FeNi/NPC                                  | --                            | 260                 | 112                                    | 23               |
| Co@Co-N-C                                 | 78                            | 314                 | 59                                     | 24               |
| SHG                                       | 230                           | 310                 | 112                                    | 25               |

**Table S7** EIS parameters obtained by fitting the Nyquist plots to the equivalent circuit model in 0.1 M KOH at -0.1 V vs. RHE.

| Catalysts                             | $R_s$ ( $\Omega$ ) | $R_{ct}$ ( $\Omega$ ) | $Q_1$ (F cm <sup>-2</sup> ) | $n_1$ |
|---------------------------------------|--------------------|-----------------------|-----------------------------|-------|
| S-Co <sub>2.5</sub> Fe <sub>7.5</sub> | 8.250              | 31.350                | 0.0307                      | 0.714 |
| S-Co <sub>5</sub> Fe <sub>5</sub>     | 2.451              | 15.970                | 0.0337                      | 0.622 |
| S-Co <sub>7.5</sub> Fe <sub>2.5</sub> | 5.253              | 31.560                | 0.0220                      | 0.766 |

**Table S8** Comparison of HER/OER bi-functional activities for the as-prepared catalysts in this study with the other reported catalysts in literatures.

| Catalysts                                                                       | Electrolyte      | Cell voltage<br>$E_{10}$ (V) | Reference        |
|---------------------------------------------------------------------------------|------------------|------------------------------|------------------|
| <b>S-Co<sub>2.5</sub>Fe<sub>7.5</sub>    S-Co<sub>2.5</sub>Fe<sub>7.5</sub></b> | <b>0.1 M KOH</b> | <b>1.84</b>                  | <b>This work</b> |
| <b>S-Co<sub>5</sub>Fe<sub>5</sub>    S-Co<sub>5</sub>Fe<sub>5</sub></b>         | <b>0.1 M KOH</b> | <b>1.62</b>                  | <b>This work</b> |
| <b>S-Co<sub>7.5</sub>Fe<sub>2.5</sub>    S-Co<sub>7.5</sub>Fe<sub>2.5</sub></b> | <b>0.1 M KOH</b> | <b>1.76</b>                  | <b>This work</b> |
| <b>RuO<sub>2</sub>    Pt/C</b>                                                  | <b>0.1 M KOH</b> | <b>1.69</b>                  | <b>This work</b> |
| CoFe@NC/NCHNSs-700   <br>CoFe@NC/NCHNSs-700                                     | 1 M KOH          | 1.665                        | 26               |
| CoFe@N-GCNCs-700   <br>CoFe@N-GCNCs-700                                         | 1 M KOH          | 1.63                         | 27               |
| CoFe-N-CNTs/CNFs-900   <br>CoFe-N-CNTs/CNFs-900                                 | 1 M KOH          | 1.66                         | 28               |
| Ni <sub>3</sub> S <sub>2</sub>    Ni <sub>3</sub> S <sub>2</sub>                | 1 M KOH          | 1.63                         | 29               |
| Co <sub>0.85</sub> Se/NF    Co <sub>0.85</sub> Se/NF                            | 1 M KOH          | 1.63                         | 30               |

**Table S9** Comparison of ZnAB performance using S-Co<sub>5</sub>Fe<sub>5</sub> as cathode catalyst with the other reported catalysts in literatures.

| ZnAB                                              | OCP (V)     | Peak power density<br>(mW cm <sup>-2</sup> ) | Reference        |
|---------------------------------------------------|-------------|----------------------------------------------|------------------|
| <b>Zn plate    S-Co<sub>5</sub>Fe<sub>5</sub></b> | <b>1.46</b> | <b>179</b>                                   | <b>This work</b> |
| Zn plate    CoFe/N-HCSs                           | 1.387       | 96.5                                         | 31               |
| Zn plate    CoFe/FeNC                             | --          | 154.1                                        | 32               |
| Zn plate    CoFe@NO-CNT                           | 1.45        | 142                                          | 33               |
| Zn plate    NPSC-Co <sub>2</sub> Fe <sub>1</sub>  | 1.44        | 174.6                                        | 34               |
| Zn plate    CoFe@N-CNWF                           | 1.46        | 90                                           | 35               |
| Zn plate    CoO <sub>x</sub> @NOC                 | 1.44        | 141.65                                       | 36               |
| Zn plate    Co-MOF-800                            | 1.38        | 144                                          | 37               |
| Zn plate    NCFPO-350                             | 1.36        | 74.6                                         | 38               |
| Zn plate    AlFeCoNiMn                            | 1.44        | 136                                          | 39               |
| Zn plate    CuCo <sub>2</sub> S <sub>4</sub>      | 1.38        | 123.9                                        | 40               |



## REFERENCES

- 1 S. Li, X. Yang, S. Yang, Q. Gao, S. Zhang, X. Yu, Y. Fang, S. Yang and X. Cai, *J. Mater. Chem. A*, 2020, **8**, 5601-5611.
- 2 Z. Zhang, X. Liang, J. Li, J. Qian, Y. Liu, S. Yang, Y. Wang, D. Gao and D. Xue, *ACS Appl. Mater. Interfaces*, 2020, **12**, 21661-21669.
- 3 Q. Lu, H. Wu, X. Zheng, Y. Chen, A. L. Rogach, X. Han, Y. Deng and W. Hu, *Adv. Sci.*, 2021, **8**, 2101438.
- 4 X. Zheng, X. Han, Y. Cao, Y. Zhang, D. Nordlund, J. Wang, S. Chou, H. Liu, L. Li, C. Zhong, Y. Deng and W. Hu, *Adv. Mater.*, 2020, **32**, 2000607.
- 5 X. Liu, X. Li, M. An, Y. Gao, Z. Cao and J. Liu, *Electrochim. Acta*, 2020, **351**, 136249.
- 6 J. Sun, L. Du, B. Sun, G. Han, Y. Ma, J. Wang, H. Huo, P. Zuo, C. Du and G. Yin, *J. Energy Chem.*, 2021, **54**, 217-224.
- 7 W. Liu, D. Rao, J. Bao, L. Xu, Y. Lei and H. Li, *J. Energy Chem.*, 2021, **57**, 428-435.
- 8 H. Li, J. Wang, R. Qi, Y. Hu, J. Zhang, H. Zhao, J. Zhang and Y. Zhao, *Appl. Catal. B*, 2021, **285**, 119778.
- 9 Q. Shi, Q. Liu, Y. Ma, Z. Fang, Z. Liang, G. Shao, B. Tang, W. Yang, L. Qin and X. Fang, *Adv. Energy Mater.*, 2020, **10**, 1903854.
- 10 J. Béjar, L. Álvarez-Contreras, J. Ledesma-García, N. Arjona and L. G. Arriaga, *J. Mater. Chem. A*, 2020, **8**, 8554-8565.
- 11 A. Wang, C. Zhao, M. Yu and W. Wang, *Appl. Catal. B*, 2021, **281**, 119514.
- 12 A. Aijaz, J. Masa, C. Rosler, W. Xia, P. Weide, A. J. Botz, R. A. Fischer, W. Schuhmann and M. Muhler, *Angew. Chem. Int. Ed. Engl.*, 2016, **55**, 4087-4091.
- 13 Y. Zhan, G. Du, S. Yang, C. Xu, M. Lu, Z. Liu and J. Y. Lee, *ACS Appl. Mater. Interfaces*, 2015, **7**, 12930-12936.
- 14 X. X. Liu, J. B. Zang, L. Chen, L. B. Chen, X. Chen, P. Wu, S. Y. Zhou and Y. H. Wang, *J. Mater. Chem. A*, 2017, **5**, 5865-5872.
- 15 S. Dresp, F. Luo, R. Schmack, S. Kühn, M. Gliech and P. Strasser, *Energy Environ.*

- Sci.*, 2016, **9**, 2020-2024.
- 16 J. Wang, H. Wu, D. Gao, S. Miao, G. Wang and X. Bao, *Nano Energy*, 2015, **13**, 387-396.
  - 17 D. Wang, X. Chen, D. G. Evans and W. Yang, *Nanoscale*, 2013, **5**, 5312-5315.
  - 18 H. F. Wang, C. Tang, B. Wang, B. Q. Li and Q. Zhang, *Adv. Mater.*, 2017, **29**, 1702327.
  - 19 L. An, Y. Li, M. Luo, J. Yin, Y.-Q. Zhao, C. Xu, F. Cheng, Y. Yang, P. Xi and S. Guo, *Adv. Funct. Mater.*, 2017, **27**, 1703779.
  - 20 X. Zhu, T. Jin, C. Tian, C. Lu, X. Liu, M. Zeng, X. Zhuang, S. Yang, L. He, H. Liu and S. Dai, *Adv. Mater.*, 2017, **29**, 1704091.
  - 21 J. Yang, X. Wang, B. Li, L. Ma, L. Shi, Y. Xiong and H. Xu, *Adv. Funct. Mater.*, 2017, **27**, 1606497.
  - 22 N. Ma, Y. Jia, X. Yang, X. She, L. Zhang, Z. Peng, X. Yao and D. Yang, *J. Mater. Chem. A*, 2016, **4**, 6376-6384.
  - 23 H.-X. Zhong, J. Wang, Q. Zhang, F. Meng, D. Bao, T. Liu, X.-Y. Yang, Z.-W. Chang, J.-M. Yan and X.-B. Zhang, *Adv. Sustainable Syst.*, 2017, **1**, 1700020.
  - 24 Y. Wang, Y. Nie, W. Ding, S. G. Chen, K. Xiong, X. Q. Qi, Y. Zhang, J. Wang and Z. D. Wei, *Chem. Commun.*, 2015, **51**, 8942-8945.
  - 25 C. Hu and L. Dai, *Adv. Mater.*, 2017, **29**, 1604942.
  - 26 S. Wang, H. Wang, C. Huang, P. Ye, X. Luo, J. Ning, Y. Zhong and Y. Hu, *Appl. Catal. B*, 2021, **298**, 120512.
  - 27 H.-J. Niu, Y.-P. Chen, R.-M. Sun, A.-J. Wang, L.-P. Mei, L. Zhang and J.-J. Feng, *J. Power Sources*, 2020, **480**, 229107.
  - 28 S. Wang, J. Wang, X. Wang, L. Li, J. Qin and M. Cao, *J. Energy Chem.*, 2021, **53**, 422-432.
  - 29 X. Zheng, X. Han, Y. Zhang, J. Wang, C. Zhong, Y. Deng and W. Hu, *Nanoscale*, 2019, **11**, 5646-5654.
  - 30 W. Ding, Y. Cao, H. Liu, A. Wang, C. Zhang and X. Zheng, *Rare Met.*, 2021, **40**, 1373-1382.
  - 31 J. Li, Y. Kang, W. Wei, X. Li, Z. Lei and P. Liu, *Chem. Eng. J.*, 2021, **407**, 127961.

- 32 Z. Peng, H. Wang, X. Xia, X. Zhang and Z. Dong, *ACS Sustainable Chem. Eng.*, 2020, **8**, 9009-9016.
- 33 M. Li, S. Chen, B. Li, Y. Huang, X. Lv, P. Sun, L. Fang and X. Sun, *Electrochim. Acta*, 2021, **388**, 138587.
- 34 K. He, J. Zai, X. Liu, Y. Zhu, A. Iqbal, T. Tadesse Tsega, Y. Zhang, N. Ali and X. Qian, *Appl. Catal. B*, 2020, **265**, 118594.
- 35 Q. Zhou, L. Ai, Q. Li, S. Hou, L. Xu, D. Sun, H. Pang, K. Huang and Y. Tang, *Chem. Eng. J.*, 2021, **417**, 127895.
- 36 M. E. Hilal, H. A. Younus, S. Chaemchuen, S. Dekyvere, X. Zen, D. He, J. Park, T. Han and F. Verpoort, *Catal. Sci. Technol.*, 2021, **11**, 4149-4161.
- 37 X. Duan, N. Pan, C. Sun, K. Zhang, X. Zhu, M. Zhang, L. Song and H. Zheng, *J. Energy Chem.*, 2021, **56**, 290-298.
- 38 D.-S. Pan, P. Chen, L.-L. Zhou, J.-H. Liu, Z.-H. Guo and J.-L. Song, *J. Power Sources*, 2021, **498**, 229859.
- 39 S. Li, X. Zhou, G. Fang, G. Xie, X. Liu, X. Lin and H.-J. Qiu, *ACS Appl. Energy Mater.*, 2020, **3**, 7710-7718.
- 40 R. Zhang, Z. Hu, S. Cheng, W. Ke, T. Ning, J. Wu, X. Fu and G. Zhu, *Inorg. Chem.*, 2021, **60**, 6721-6730.
